# Supplementary material
Source: PubMed Central journal article supplement (PMC3284159)
Supplement: supp_M013003_jlr.M013003-1.pdf [file supp_M013003_jlr.M013003-1.pdf]

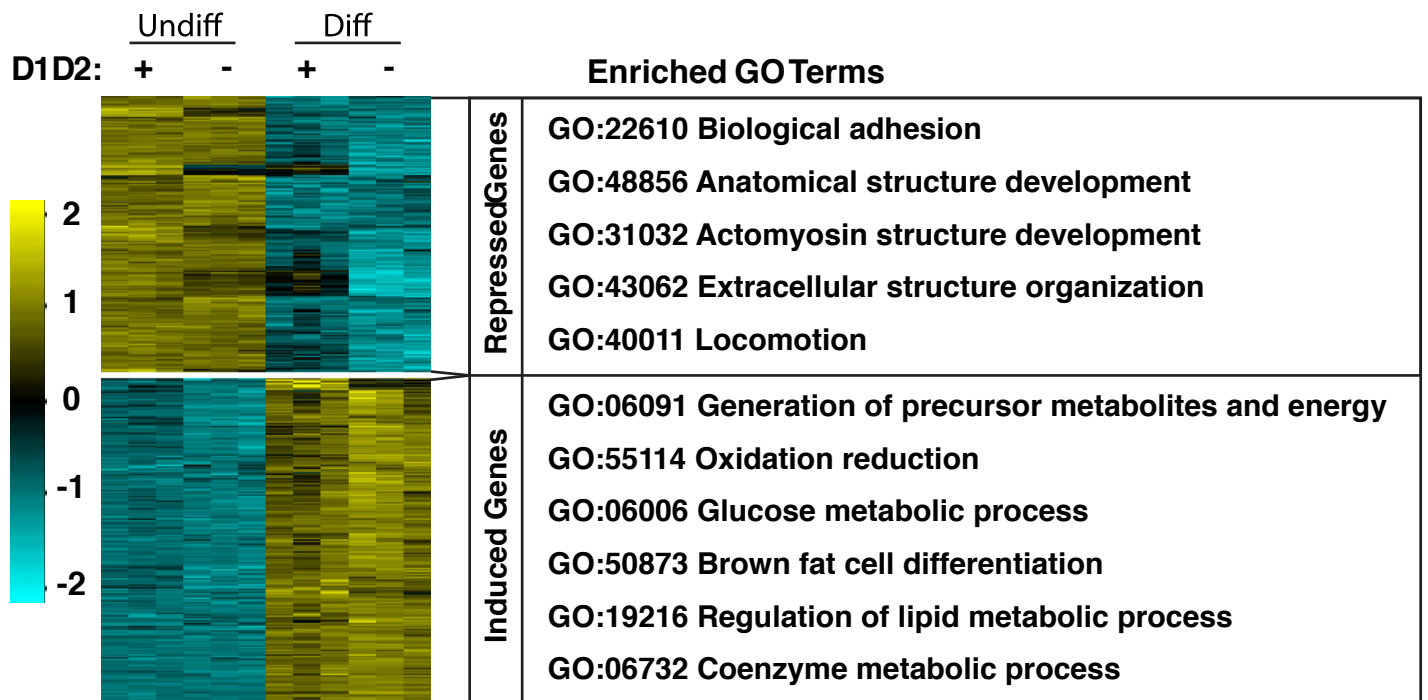

## Supplementary Figure Legend

Supplementary Figure 1. D1D2KO adipocytes have a transcriptional profile similar to WT adipocytes. (A) Heatmap of unbiased HOPACH clustering of samples from undifferentiated and differentiated MEFs from WT and D1D2KO using criteria of greater than two-fold change and nominal  $p < 0.0001$ . Shown at right are GO pathways for each cluster of the heat map.

Supplementary Table 1. Gene Set Enrichment Analysis comparing the effects of the differentiation protocol in WT and D1D2 KO cells.

| KEGG Pathway Name (Number)                      | WT    |       |         |      | D1D2 KO |       |         |      |
|-------------------------------------------------|-------|-------|---------|------|---------|-------|---------|------|
|                                                 | ES    | NES   | P-value | Rank | ES      | NES   | P-value | Rank |
| Val, Leu and Ile degradation (HSA00280)         | 0.859 | 2.593 | <0.001  | 1    | 0.860   | 2.582 | <0.001  | 2    |
| Oxidative phosphorylation (HSA00190)            | 0.716 | 2.567 | <0.001  | 2    | 0.807   | 2.875 | <0.001  | 1    |
| PPAR signaling pathway (HSA03320)               | 0.798 | 2.566 | <0.001  | 3    | 0.807   | 2.552 | <0.001  | 3    |
| Fatty acid metabolism (HSA00071)                | 0.814 | 2.439 | <0.001  | 4    | 0.807   | 2.379 | <0.001  | 6    |
| Propanoate metabolism (HSA00640)                | 0.816 | 2.427 | <0.001  | 5    | 0.843   | 2.386 | <0.001  | 5    |
| Pyruvate metabolism (HSA00620)                  | 0.796 | 2.423 | <0.001  | 6    | 0.818   | 2.377 | <0.001  | 7    |
| Citrate cycle (HSA00020)                        | 0.855 | 2.364 | <0.001  | 7    | 0.904   | 2.447 | <0.001  | 4    |
| Metabolism of xenobiotics and CYP450 (HSA00980) | 0.787 | 2.342 | <0.001  | 8    | 0.749   | 2.171 | <0.001  | 10   |
| Glycolysis and gluconeogenesis (HSA00010)       | 0.667 | 2.164 | <0.001  | 9    | 0.747   | 2.364 | <0.001  | 8    |
| Butanoate metabolism (HSA00050)                 | 0.680 | 2.084 | <0.001  | 10   | NA      | NA    | NA      | NA   |
| Gly, Ser and Thr metabolism (HSA00260)          | NA    | NA    | NA      | NA   | 0.722   | 2.213 | <0.001  | 9    |

D1D2KO adipocytes show similar gene set enrichment as WT adipocytes with differentiation. ES, Enrichment Score, NES, Normalized Enrichment Score. P-value and False Discovery Rate (FDR) are calculated as described (1).

Supplementary Table 2. Quantitative PCR analysis of markers of adipocyte differentiation.

| Class                    | Gene      | Relative Expression* |         |
|--------------------------|-----------|----------------------|---------|
|                          |           | D1D2KO-Diff          | WT-Diff |
| Pan-adipocyte            | Adipoq    | 435.3                | 284.8   |
| White adipocyte specific | Retn      | 1562.3               | 828.1   |
|                          | Retnla    | 9.6                  | 4.5     |
|                          | Serpina3k | 2.3                  | 3.6     |
|                          | Psat1     | 2.8                  | 1.7     |
|                          | Hmgn3     | 1.1                  | 1.0     |
| Brown adipocyte specific | Cox8b     | 375.6                | 111.0   |
|                          | Ucp1      | 347.6                | 120.5   |
|                          | Otop1     | 66.5                 | 24.5    |
|                          | Cidea     | 7.5                  | 4.0     |
|                          | Cycs      | 8.6                  | 5.0     |
|                          | Cpn2      | 10.3                 | 3.2     |
|                          | Acaa2     | 6.5                  | 5.4     |
|                          | Cox5b     | 5.4                  | 3.6     |
|                          | Cox4i1    | 5.8                  | 3.5     |
|                          | Mt-co3    | 4.7                  | 2.8     |
|                          | Prdm16    | 3.7                  | 2.0     |
| Transcription Factor     | Srebf1    | 1.5                  | 2.1     |
|                          | Ppard     | 2.9                  | 2.2     |
|                          | Pparg     | 61.1                 | 57.6    |
|                          | Ppara     | 16.5                 | 7.7     |
|                          | Cebpb     | 2.1                  | 2.2     |
|                          | Cebpa     | 20.7                 | 11.7    |
|                          | Cebpd     | 2.8                  | 2.7     |
| Lipolysis                | Plin1     | 65.5                 | 236.1   |
|                          | Prkar2b   | 77.9                 | 30.3    |
|                          | Lipe      | 106.3                | 71.6    |

\*Values are mean for n = 3 samples for each class and represent relative expression as compared with that for WT undifferentiated.

Analysis of induction of adipogenic genes in WT and D1D2KO adipocytes by qRT-PCR. Induction ratios were calculated by normalization to cyclophilin.

## Supplementary Reference

1. Subramanian, A., P. Tamayo, V. K. Mootha, S. Mukherjee, B. L. Ebert, M. A. Gillette, A. Paulovich, S. L. Pomeroy, T. R. Golub, E. S. Lander, and J. P. Mesirov. 2005. Gene set enrichment analysis: a knowledge-based approach for interpreting genome-wide expression profiles. *Proc Natl Acad Sci U S A* **102**: 15545-15550.
